# Supplementary material
Source: Research Square preprint supplement (doi:10.21203/rs.3.rs-9361112/v1)
Supplement: Supplementary file 1 [file d84120665886c8da0706eaed.docx]

**Table 1**: Demographics and clinical presentation of KIF11 Patients

|  | **Patient 1 (P1)** | | **Patient 2 (P2)** | |
| --- | --- | --- | --- | --- |
| Age (y), Sex | 14, F | | 60, F | |
| Ethnicity | Caucasian | | African American | |
| Medical History | Asthma  Psychiatric Disorder  Seizures | | Arthritis  T2DM  Thyroid Disease  ILD | |
| Microcephaly | Yes | | Borderline | |
| Head circumference | 51cm* | | 53cm* | |
| Lymphoedema | No | | No | |
| Intellectual disability | Mild | | No | |
| Other family members affected | Yes - Mother and Siblings | | No | |
| BCVA | **OD** | **OS** | **OD** | **OS** |
|  | 20/50 | 20/60 | 20/30 | 20/20 |
| IOP | 24 | 23 | 14 | 11 |
| Fundus Findings | Inferior scalloped chorioretinal lesion OU Dragged vessels inferotemporally  Fovea Plana | | Inferior chorioretinal lesions OU  Dragged vessels inferotemporally  Fovea Plana | |
| Additional Ocular Findings | Microcornea OU (10mm) | | Gonioscopy: Narrow Angles OU | |
| Associated Ocular Symptoms | None | | Nyctalopia | |
| Diagnosis | FEVR secondary to KIF11 mutation † | | FEVR secondary to KIF11 mutation ‡ | |
| y = Years; F = Female; T2DM = Type 2 Diabetes Mellitus; ILD = Interstitial Lung Disease; cm = Centimeters OD = Right Eye; OS = Left Eye; BCVA = Best Corrected Visual Acuity; IOP = Intra-ocular Pressure; OU = Both Eyes; mm = Millimeters; FEVR = Familial Exudative Vitreoretinopathy  *Normal range for age and gender: 53-58.5cm  † Genetic variant: Deletion of 1.85Mb within cytogenic band 10q23.33 (chr.10:94211441-96061902) which includes the *KIF11* gene  ‡ Genetic variant: heterozygous for *KIF11* c.339del, p.(Phe113Leufs*23) | | | | |
